# Supplementary figures and images for: Oral administration of cranberry-derived exosomes attenuates murine premature ovarian failure in association with changes in the specific gut microbiota and diminution in ovarian granulosa cell PANoptosis
Source: Royal Society of Chemistry journal article supplement (doi:10.1039/d4fo03468f), 2024-01-01

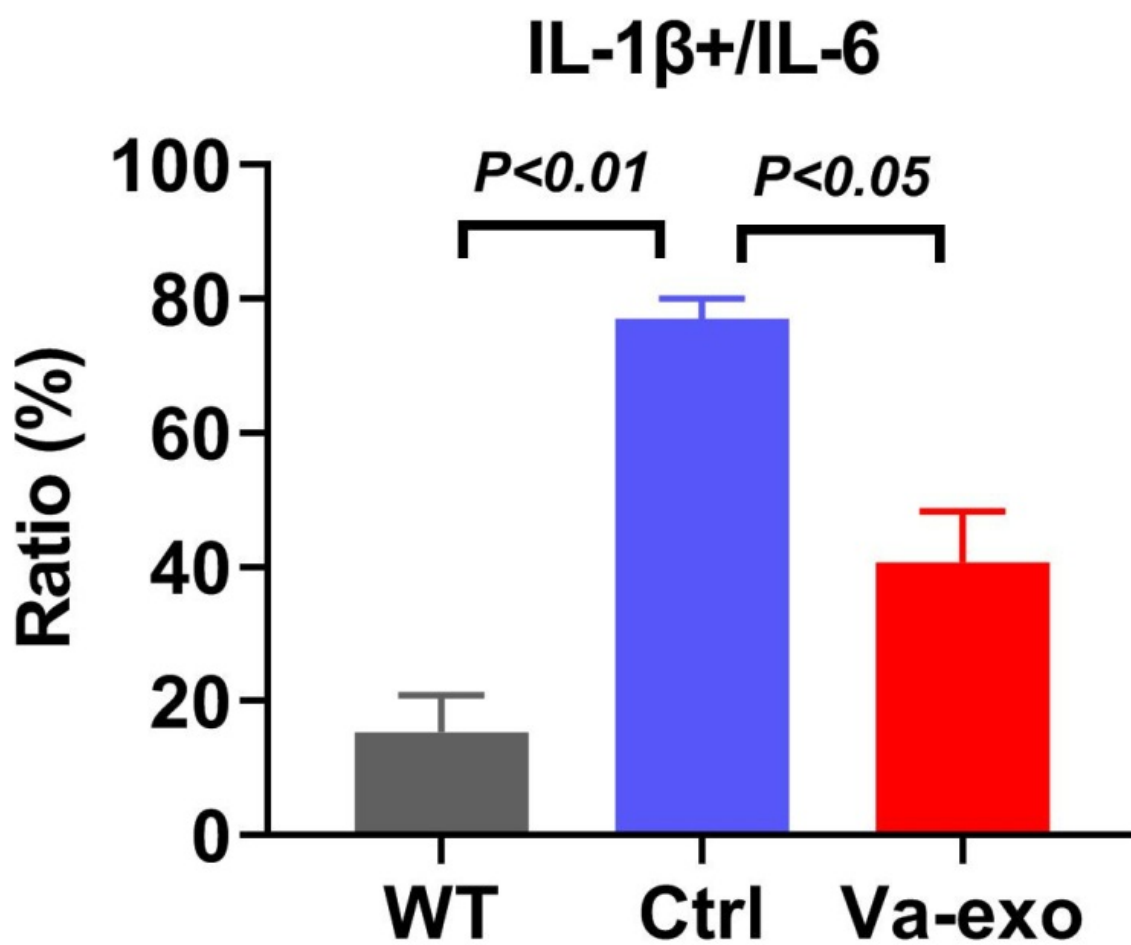

Figure S1. The quantitative statistical analysis of fluorescence positivity rate.

Supplement: d4fo03468f1.pdf [file d4fo03468f1.pdf]

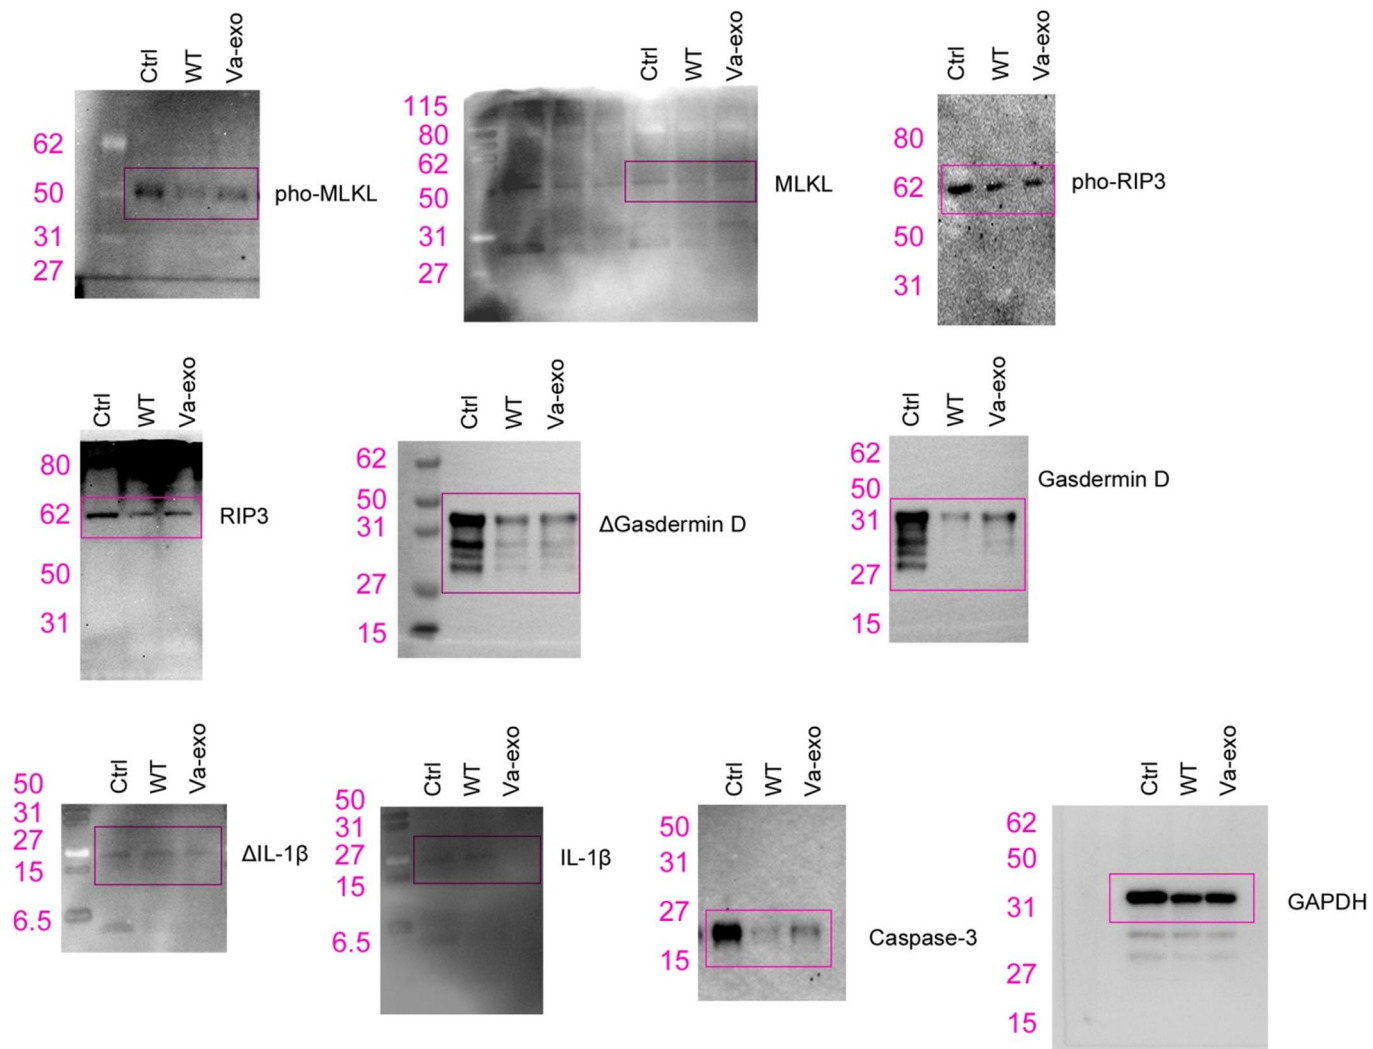

**Figure S2. The raw data of western blot.**

Supplement: d4fo03468f2.pdf [file d4fo03468f2.pdf]
